# Supplementary material for: Template-free preparation of anthracite-based nitrogen-doped porous carbons for high-performance supercapacitors and efficient electrocatalysts for the oxygen reduction reaction
Source: Royal Society of Chemistry journal article supplement (doi:10.1039/c9ra04791c), 2019-01-01
Supplement: c9ra04791c1.pdf [file c9ra04791c1.pdf]

***Electronic supplementary information***

**Template-free preparation of anthracite-based nitrogen-doped porous carbons for high-performance supercapacitors and efficient electrocatalysts for oxygen reduction reaction**

Jiawei Qi, Bolin Jin, Peiyao Bai, Wendu Zhang and Lang Xu\*

*MOE Key Laboratory of Coal Processing and Efficient Utilization, School of Chemical Engineering and Technology, China University of Mining and Technology, 1 Daxue Road, Xuzhou, Jiangsu, 221116, China*

\*Corresponding author. *E-mail address: lang.xu@cumt.edu.cn* (L. Xu)

**Table S1** Surface and pore properties of the ANPC-1 and ANPC-2 materials. <sup>a</sup>

| Material        | $S_{BET}$<br>(m <sup>2</sup> g <sup>-1</sup> ) | $S_{micro}$<br>(m <sup>2</sup> g <sup>-1</sup> ) | $V_{pore}$<br>(cm <sup>3</sup> g <sup>-1</sup> ) | $V_{micro}$<br>(cm <sup>3</sup> g <sup>-1</sup> ) |
|-----------------|------------------------------------------------|--------------------------------------------------|--------------------------------------------------|---------------------------------------------------|
| ANPC-1-800-0    | 2768.28                                        | 2512.76                                          | 1.363                                            | 1.128                                             |
| ANPC-1-800-0.25 | 2271.05                                        | 1930.03                                          | 1.065                                            | 0.866                                             |
| ANPC-1-800-1    | 1251.03                                        | 1142.19                                          | 0.568                                            | 0.456                                             |
| ANPC-1-700-0.25 | 1990.55                                        | 1885.32                                          | 0.867                                            | 0.765                                             |
| ANPC-1-900-0.25 | 2740.14                                        | 1404.37                                          | 1.666                                            | 0.605                                             |
| ANPC-2-900-4    | 1654.08                                        | 1434.94                                          | 0.823                                            | 0.631                                             |
| ANPC-2-900-6    | 2729.92                                        | 2344.92                                          | 1.318                                            | 1.005                                             |
| ANPC-2-900-8    | 1911.54                                        | 1665.73                                          | 0.953                                            | 0.736                                             |
| ANPC-2-800-6    | 2204.50                                        | 2004.56                                          | 1.086                                            | 0.861                                             |
| ANPC-2-1000-6   | 2541.56                                        | 2054.74                                          | 1.328                                            | 0.896                                             |

<sup>a</sup>  $S_{BET}$ : BET specific surface area;  $S_{micro}$ : micropore surface area based on the t-plot method;  $V_{pore}$ : pore volume;  $V_{micro}$ : micropore volume based on the t-plot method.

**Table S2** A comparison of BET specific surface area ( $S_{BET}$ ) and specific capacitance ( $C_s$ ) values of porous carbonaceous materials made from different carbon sources. <sup>a</sup>

| Carbon source | $S_{BET}$<br>(m <sup>2</sup> g <sup>-1</sup> ) | $C_s$<br>(F g <sup>-1</sup> ) | Current density<br>(A g <sup>-1</sup> ) | Ref       |
|---------------|------------------------------------------------|-------------------------------|-----------------------------------------|-----------|
| Coal          | 902                                            | 230                           | 1                                       | S1        |
| Coal          | 621.15                                         | 227                           | 1                                       | S2        |
| Coal          | 1872                                           | 211                           | 1                                       | S3        |
| Agarose       | 2666                                           | 214                           | 0.2                                     | S4        |
| Wheat flour   | 995                                            | 178.5                         | 0.5                                     | S5        |
| Corn straws   | 2790.4                                         | 327                           | 0.2                                     | S6        |
| Anthracite    | 2271.05                                        | 346                           | 0.5                                     | This work |

<sup>a</sup> All the  $C_s$  values in the table were obtained from the three-electrode system using 6 M KOH as the electrolyte.

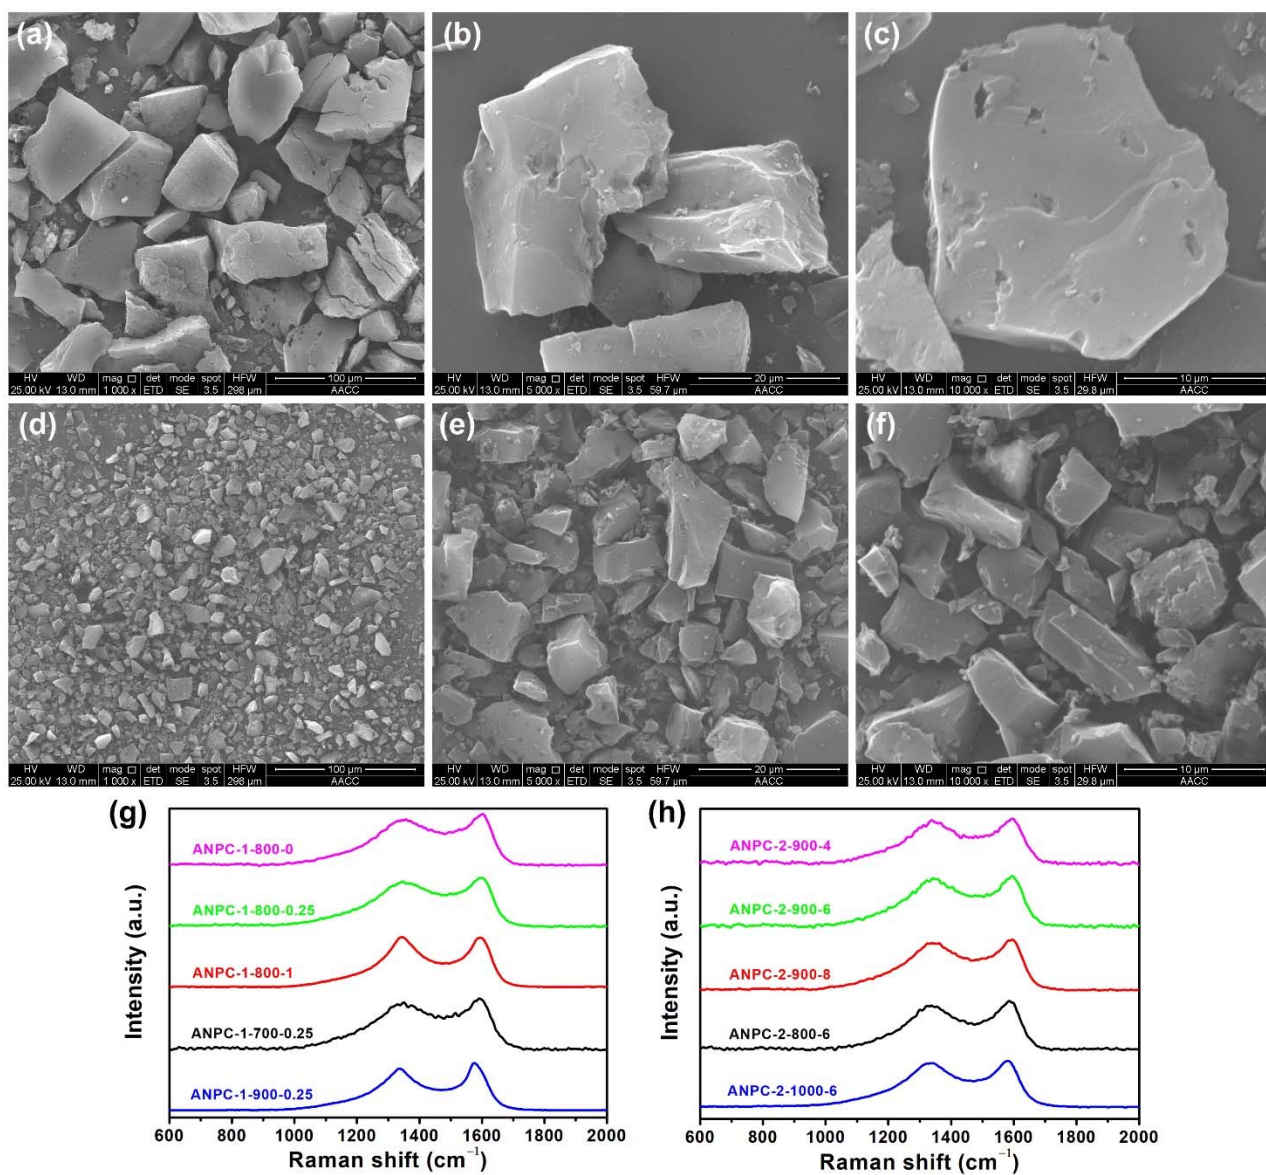

**Fig. S1** SEM images of (a-c) ANPC-1-800-0.25 and (d-f) ANPC-2-900-6 with different magnifications (1k: a, d; 5k: b, e; 10k: c, f). Raman spectra of (g) the ANPC-1 materials and (h) the ANPC-2 materials.

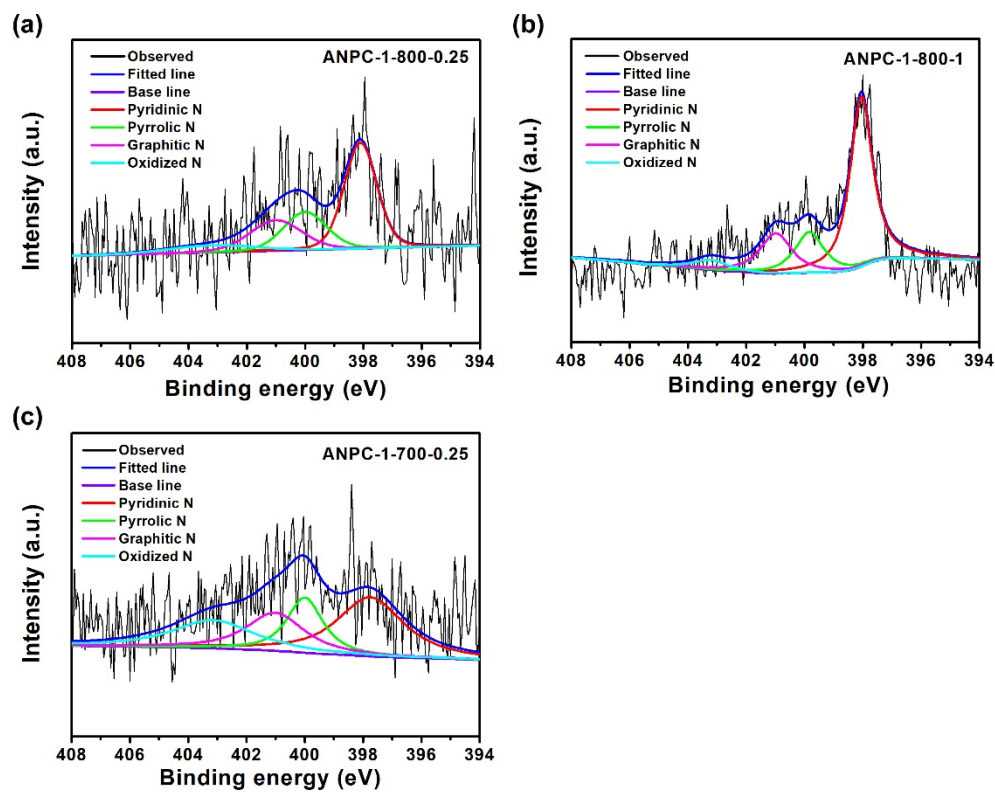

**Fig. S2** High-resolution XPS N 1s spectra of (a) ANPC-1-800-0.25, (b) ANPC-1-800-1 and (c) ANPC-1-700-0.25.

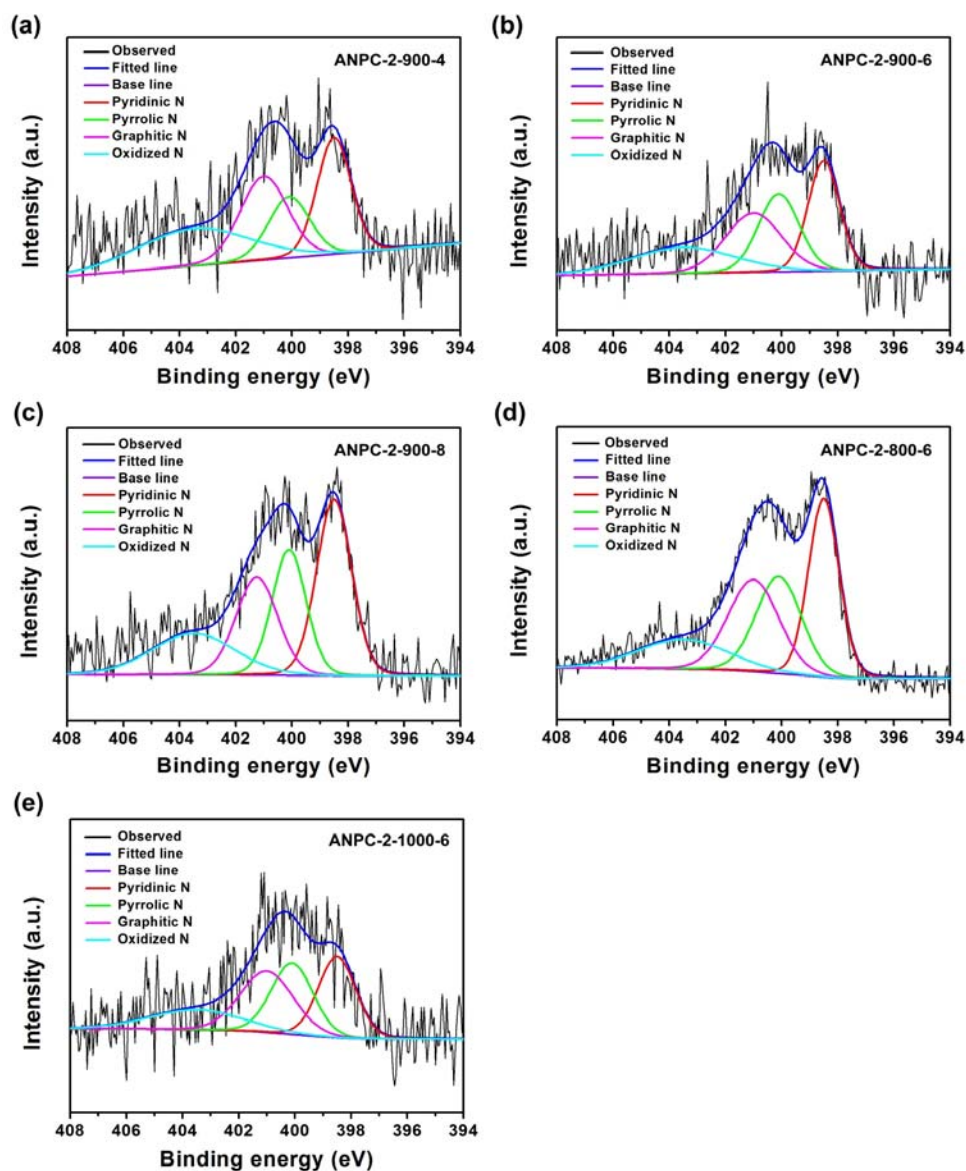

**Fig. S3** High-resolution XPS N 1s spectra of (a) ANPC-2-900-4, (b) ANPC-2-900-6, (c) ANPC-2-900-8, (d) ANPC-2-800-6 and (e) ANPC-2-1000-6.

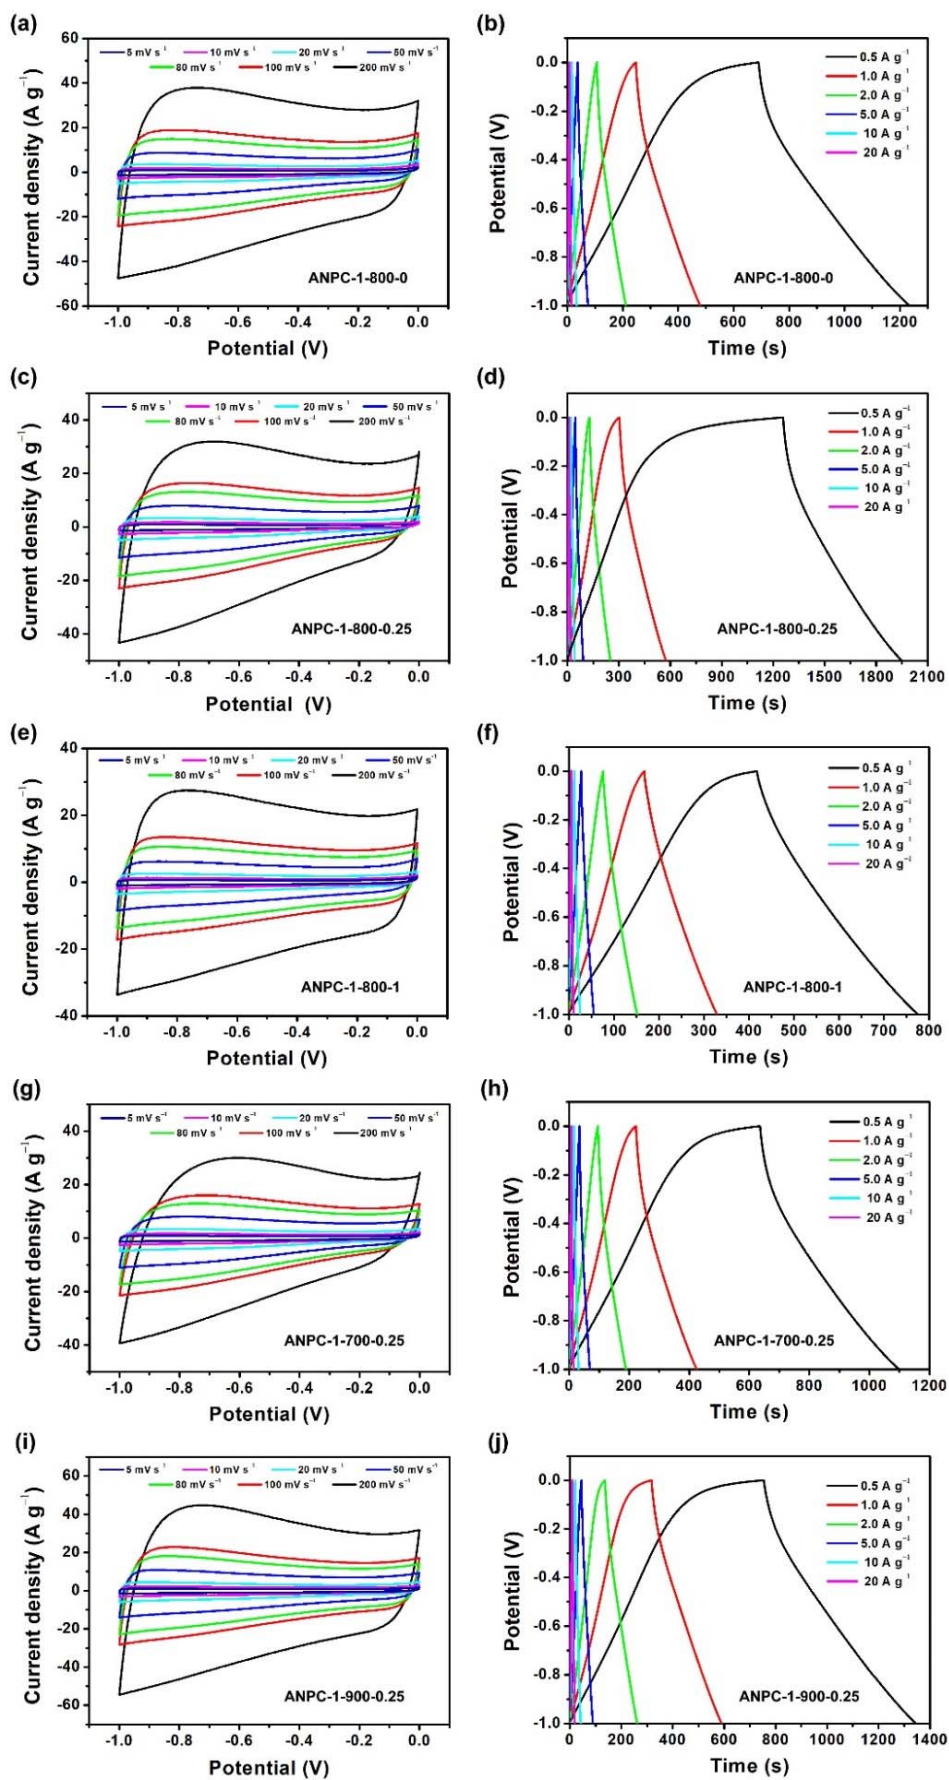

**Fig. S4** CV curves of (a) ANPC-1-800-0, (c) ANPC-1-800-0.25, (e) ANPC-1-800-1, (g) ANPC-1-700-0.25 and (i) ANPC-1-900-0.25 at different scan rates; GCD curves of (b) ANPC-1-800-0, (d) ANPC-1-800-0.25, (f) ANPC-1-800-1, (h) ANPC-1-700-0.25 and (j) ANPC-1-900-0.25 at different charge/discharge current densities. All the measurements were taken in 6 M KOH.

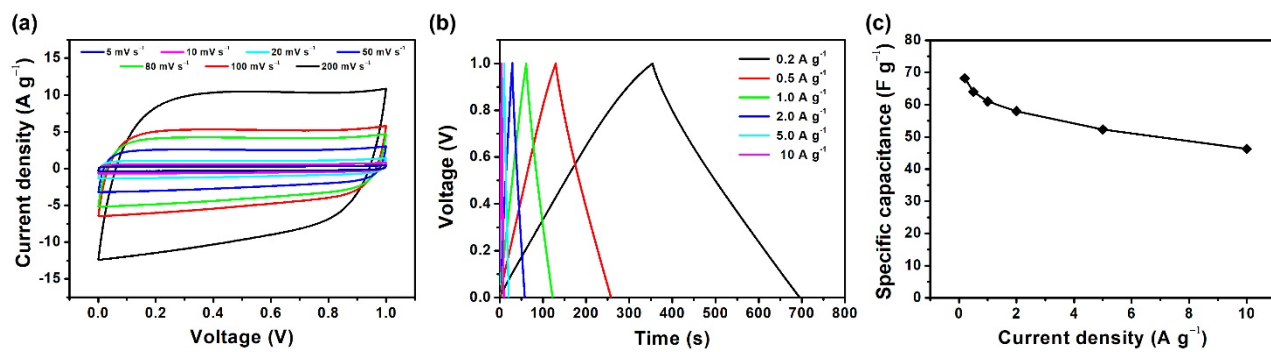

**Fig. S5** (a) CV curves of the ANPC-1-800-0.25//ANPC-1-800-0.25 supercapacitor at different scan rates; (b) GCD curves of the ANPC-1-800-0.25//ANPC-1-800-0.25 supercapacitor at different charge/discharge current densities; (c) specific capacitances of the ANPC-1-800-0.25//ANPC-1-800-0.25 supercapacitor at different current densities. All the measurements were taken in 6 M KOH.

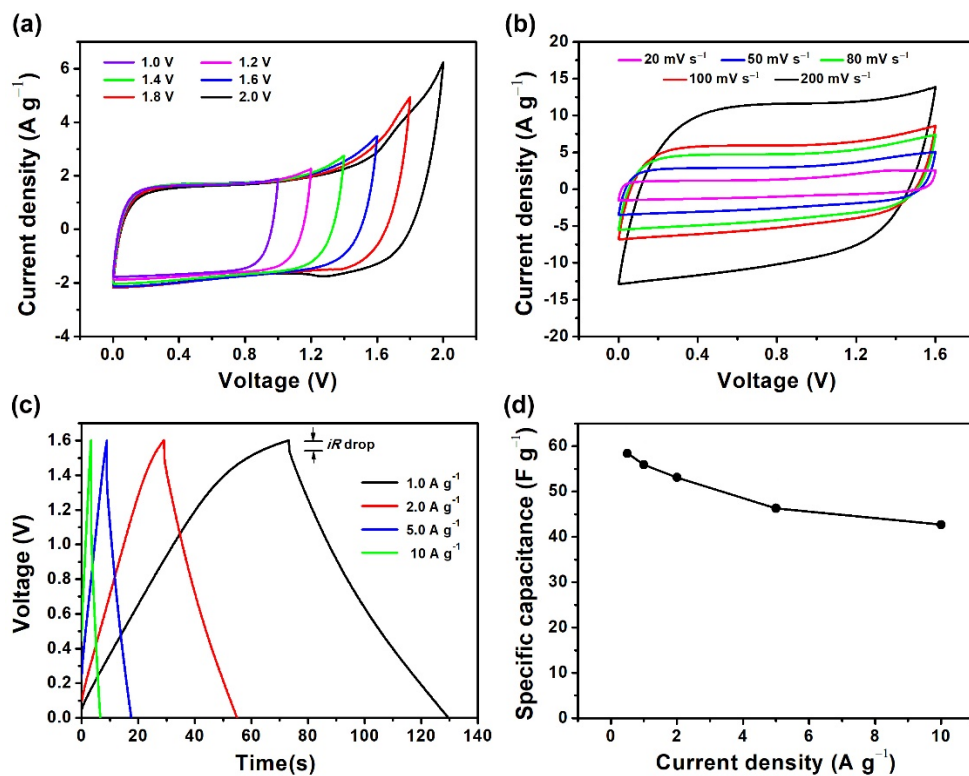

**Fig. S6** (a) CV curves of the ANPC-1-800-0.25//ANPC-1-800-0.25 supercapacitor with different voltage windows at a scan rate of 50 mV s<sup>-1</sup>; (b) CV curves of the ANPC-1-800-0.25//ANPC-1-800-0.25 supercapacitor at different scan rates; (c) GCD curves of the ANPC-1-800-0.25//ANPC-1-800-0.25 supercapacitor at different charge/discharge current densities; (d) specific capacitances of the ANPC-1-800-0.25//ANPC-1-800-0.25 supercapacitor at different current densities. All the measurements were taken in 1 M Na<sub>2</sub>SO<sub>4</sub>.

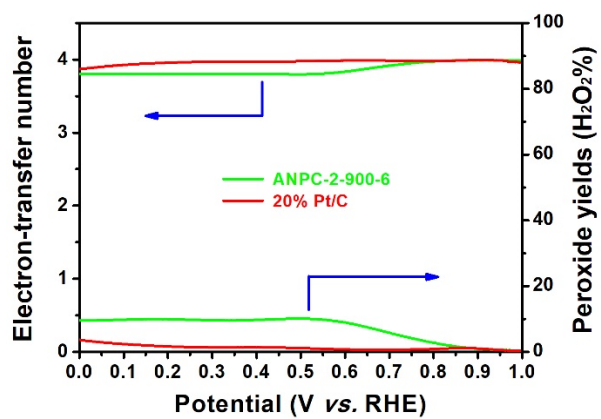

**Fig. S7** RRDE measurements in 0.1 M KOH at 1600 rpm: the electron-transfer numbers and peroxide yield of ANPC-2-900-6 and 20% Pt/C across the potentials ranging from 0 to 1.0 V vs. RHE.

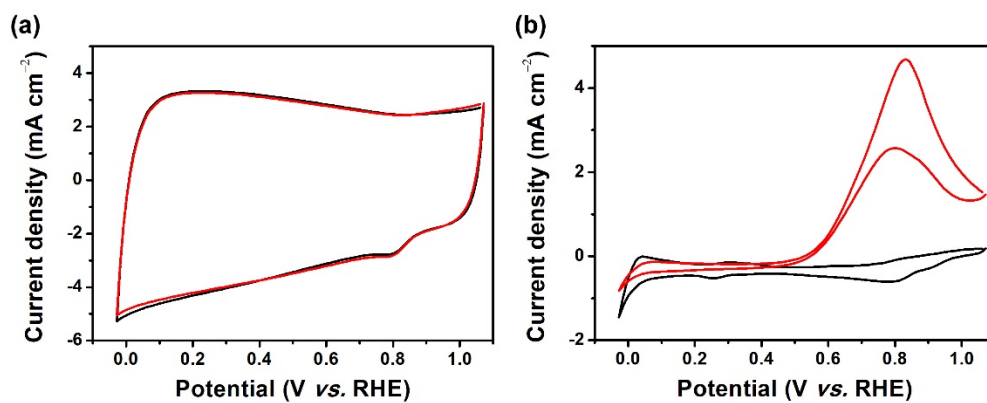

**Fig. S8** CV curves of (a) ANPC-2-900-6 and (b) 20% Pt/C at the scan rate of 50 mV s<sup>-1</sup> in O<sub>2</sub> saturated 0.1 M KOH solution at 25 °C before (black) and after (red) the addition of 1 M methanol.

## References

- S1. H. Zhao, L. Wang, D. Jia, W. Xia, J. Li and Z. Guo, *J. Mater. Chem. A*, 2014, **24**, 9338-9344.
- S2. M. Guo, J. Guo, F. Tong, D. Jia, W. Jia, J. Wu, L. Wang and Z. Sun, *RSC Adv.*, 2017, **7**, 45363-45368.
- S3. L. Wang, F. Sun, J. Gao, X. Pi, T. Pei, Z. Qie, G. Zhao and Y. Qin, *J. Taiwan Inst. Chem. Eng.*, 2018, **91**, 588-596.
- S4. B. You, F. Kang, P. Yin and Q. Zhang, *Carbon*, 2016, **103**, 9-15.
- S5. G. Lin, R. Ma, Y. Zhou, C. Hu, M. Yang, Q. Liu, S. Kaskel and J. Wang, *J. Colloid Interface Sci.*, 2018, **527**, 230-240.
- S6. Z. Qiu, Y. Wang, X. Bi, T. Zhou, J. Zhou, J. Zhao, Z. Miao, W. Yi, P. Fu and S. Zhuo, *J. Power Sources*, 2018, **376**, 82-90.
